# Supplementary material for: Effect of Input C/N Ratio on Bacterial Community of Water Biofloc and Shrimp Gut in a Commercial Zero-Exchange System with Intensive Production of Penaeus vannamei
Source: MDPI journal article supplement (doi:10.3390/microorganisms10051060), 2022-05-20
Supplement: s1 [file s1]

## Supplementary Materials

### Supplementary Table S1

The main water quality characteristics of the shrimp nursery pond.

| Parameter                                             | Value |
|-------------------------------------------------------|-------|
| Salinity (g L <sup>-1</sup> )                         | 28.3  |
| Water temperature (°C)                                | 29.4  |
| Dissolved oxygen (mg L <sup>-1</sup> )                | 5.6   |
| pH                                                    | 7.5   |
| Alkalinity (mg L <sup>-1</sup> as CaCO <sub>3</sub> ) | 194   |
| Total ammonia nitrogen (mg L <sup>-1</sup> )          | 2.8   |
| Nitrite nitrogen (mg L <sup>-1</sup> )                | 1.5   |
| Nitrate nitrogen (mg L <sup>-1</sup> )                | 31.3  |
| Total nitrogen (mg L <sup>-1</sup> )                  | 57.1  |
| Biofloc volume (mL L <sup>-1</sup> )                  | 11.5  |
| Volatile suspended solids (mg L <sup>-1</sup> )       | 284.2 |

### Supplementary Table S2

The overall means (minimum, maximum) of selected water quality parameters from biofloc-based tank systems during an 8-week intensive production trial of *P. vannamei* with three input C/N ratios.

| Parameters                                            | CN8                  | CN12                 | CN16                 |
|-------------------------------------------------------|----------------------|----------------------|----------------------|
| Salinity (g L <sup>-1</sup> )                         | 27.6 (25.0, 29.1)    | 27.4 (24.7, 29.1)    | 27.1 (24.2, 29.1)    |
| Temperature (°C)                                      | 28.6 (25.2, 31.3)    | 28.5 (25.2, 31.5)    | 28.8 (25.4, 31.9)    |
| DO (mg L <sup>-1</sup> )                              | 6.1 (5.3, 7.3)       | 6.2 (5.2, 7.4)       | 5.9 (5.0, 7.1)       |
| pH                                                    | 7.5 (7.0, 7.8)       | 7.5 (7.0, 7.8)       | 7.4 (6.9, 7.8)       |
| Alkalinity (mg L <sup>-1</sup> as CaCO <sub>3</sub> ) | 168.4 (132.0, 210.0) | 183.6 (132.0, 225.0) | 214.3 (132.0, 241.0) |
| TAN (mg L <sup>-1</sup> )                             | 0.42 (0.04, 1.23)    | 0.33 (0.02, 1.01)    | 0.27 (0.01, 0.93)    |
| NO <sub>2</sub> <sup>-</sup> -N (mg L <sup>-1</sup> ) | 0.32 (0.08, 1.26)    | 0.46 (0.10, 1.71)    | 0.53 (0.02, 2.23)    |
| BFV (mL L <sup>-1</sup> )                             | 17.7 (9.5, 27.8)     | 20.9 (9.5, 26.3)     | 22.7 (9.5, 29.5)     |
| VSS (mg L <sup>-1</sup> )                             | 201.9 (123.0, 292.5) | 217.5 (135.0, 303.7) | 233.6 (134.0, 321.0) |

DO: Dissolved oxygen; TAN: total ammonia nitrogen; BFV: biofloc volume; VSS: volatile suspended solids.
